# Supplementary material for: Globally distributed root endophyte Phialocephala subalpina links pathogenic and saprophytic lifestyles
Source: PubMed Central journal article supplement (PMC5148876; doi:10.1186/s12864-016-3369-8), 2016-12-09

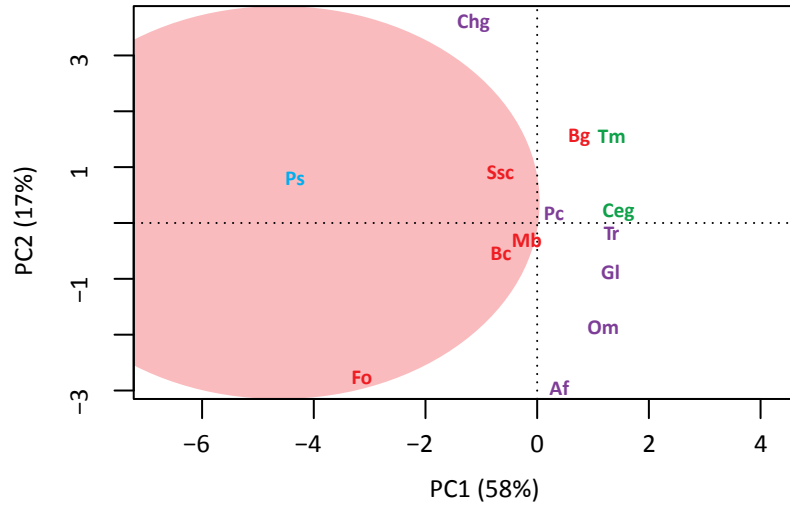

Supplement: 12864_2016_3369_MOESM7_ESM.pdf [file 12864_2016_3369_MOESM7_ESM.pdf]
