# Supplementary material for: Globally distributed root endophyte Phialocephala subalpina links pathogenic and saprophytic lifestyles
Source: PubMed Central journal article supplement (PMC5148876; doi:10.1186/s12864-016-3369-8), 2016-12-09
Supplement: 12864_2016_3369_MOESM8_ESM.pdf [file 12864_2016_3369_MOESM8_ESM.pdf]

***ab initio* repeat library**

RepeatScout (l-mer-table, repeatscout)  
Filter step 1 (MS, low complexity)  
blastclust (-S 90 -L 0.9 -b F -p F)

**other supporting evidence**

454 ESTs *P. subalpina*  
(TE and non-TE with >4 matches on genome)  
Sanger-sequenced ESTs  
(TE and non-TE with >4 matches on genome)  
manually annotated TEs

Filter out non-TE sequences (e.g. HET domain proteins)

**Use raw library and map against genome**

**Get consensus for complete TEs and classify them (especially highly abundant TEs)**

**manually-curated TE library for repeat masking prior to annotation**
